**TITLE:** DETECTION OF ANESTHESIA MACHINE LEAKS WITH NITROGEN, ENDTIDAL CO<sub>2</sub>, PACO<sub>2</sub> AND PULSE OXIMETRY DURING SPONTANEOUS VENTILATION IN ANESTHETIZED DOGS

**AUTHORS:** L.C. Jameson, M.D., P.M. Popic, M.D.

**AFFILIATION:** Anesthesia Department, University of Wisconsin, Madison, WI 53792

Anesthesia risk management programs emphasize the anesthesia machine check out to prevent leaks that could compromise the ability to ventilate a patient. Machine leaks have multiple sources and can occur at any time during the anesthetic. This study was designed to assess the physiologic effect of machine leaks on anesthetized dogs during spontaneous ventilation and the ability of current patient monitors to detect machine leaks.

**METHODS:** Seven, thirty kg, mongrel dogs\* were anesthetized and maintained with 1.5% halothane (H), N<sub>2</sub>O/O<sub>2</sub> using a Modulus I (OHMEDA) anesthesia machine. The dogs were intubated with 6.0 OET with the cuff positioned just below the vocal cords. An 18 gu IV, femoral arterial line and clinical monitors were placed. The standard leaks (2 or 4 l/min at 10 cm H<sub>2</sub>O anesthesia circle pressure) were placed in the inspired limb, expired limb and in the CO<sub>2</sub> absorber of the anesthesia circle. Endotracheal cuff leaks were 5 cm H<sub>2</sub>O cuff pressure and cuff deflated. During the 10 min control period, the animal spontaneously ventilated with a fresh gas flow (FGF) of 1.7 l/min (0.7:1.0 l/min of O<sub>2</sub>:N<sub>2</sub>O) and 5.0 l/min (2:3 l/min of O<sub>2</sub>:N<sub>2</sub>O). The standard leaks were introduced and data recorded each minute for 5 minutes. The following data was recorded each minute: end tidal (ET) CO<sub>2</sub>, tongue pulse oximetry (CitiCare Systems POET®II); inspired N<sub>2</sub>, O<sub>2</sub>, H, N<sub>2</sub>O, ET CO<sub>2</sub> (Marquette Gas Analysis Medical Gas Analyzer 1100); tidal volume, minute ventilation and respiratory rate (Ohio 5400 Volume Monitor), arterial BP and heart rate (HR) (Hewlett Packard 78205D Physiologic Monitor). Three ABG were analyzed at the end of each control and study period (Coring 178 pH Blood Gas Analyzer). Statistical significance was considered p<0.05

using chi-square analysis.

**RESULTS:** A physiologic effect was a change in PaCO<sub>2</sub> of 1.5 torr or more. For all leaks, a physiologic effect was significantly (p<0.05 chi-square) more likely to occur during 1.7 l/min FGF (36/47) than 5 l/min FGF (9/44) (table 1). There was no N<sub>2</sub> present during the control periods. In all conditions when a significant leak occurred (mean ΔPaCO<sub>2</sub>=-3.00±1.37 torr, n=39), N<sub>2</sub> value was ≥ 1.0%. N<sub>2</sub> always predicted a significant leak (p≤ 0.01). Nitrogen was never present unless a physiologic effect had occurred. The POET®II's ETCO<sub>2</sub> value fell more than 2 torr (mean ΔX=-4.0±1.95 torr) in 41 of the 45 instances where N<sub>2</sub> appeared and PaCO<sub>2</sub> decreased. There was no predictive relationship between the PaCO<sub>2</sub> and N<sub>2</sub> or ETCO<sub>2</sub>. When a physiologic change occurred, the FGF had no significant effect on ΔPaCO<sub>2</sub> (1.7 l/min:2.9±1.4 torr; 5.0 l/min:3.4±1.4 torr) or increase in N<sub>2</sub> (1.7 l/min:3.6±2.7 %; 5.0 l/min:2.5±1.8 %). In all cases where PaCO<sub>2</sub> and N<sub>2</sub> changed, there was a small (-0.2 ± 0.2 %) decrease in ET H. Pulse oximetry did not change during any condition.

**DISCUSSION:** The change in PaCO<sub>2</sub> could not be predicted by known size of machine leak, FGF, ΔETCO<sub>2</sub> or ΔN<sub>2</sub>. During spontaneous ventilation the magnitude of the leak may vary greatly due to inspiratory flow differences between dogs and conditions. Nitrogen always predicted the presence of a significant leak. The fall in ETCO<sub>2</sub> and H while consistent were small and may not be clinically noted during spontaneous ventilation. Five l/min FGF significantly reduced the risk of a physiologic significant leak but did not eliminate it.

Table 1. Occurrence of a Physiologically Significant Leak\*

| Fresh Gas<br>flow | Inspired Leak |         | Expired Leak |         | CO <sub>2</sub> Absorber Leak |         | Cuff Leak |        |
|-------------------|---------------|---------|--------------|---------|-------------------------------|---------|-----------|--------|
|                   | 2 L/min       | 4 L/min | 2 L/min      | 4 L/min | 2 L/min                       | 4 L/min | down      | 5 torr |
| 1.7 l/min         | 6/6           | 6/6     | 6/6          | 5/6     | 6/7                           | 5/6     | 2/6       | 1/4    |
| 5.0 l/min         | 4/6           | 2/6     | 0/5          | 0/6     | 0/6                           | 0/6     | 3/6       | 1/4    |

\* Change in PaCO<sub>2</sub> of 1.5 torr or more.

\*Study approved by Research Animal Resources Center, Univ. of Wisconsin

A1032

**TITLE** AN ASSESSMENT OF MEDICAL STUDENT CONFIDENCE IN RECOGNISING THE POSITION OF THE ENDOTRACHEAL TUBE POSITION AFTER INTUBATION.

**AUTHORS** D. O'Flaherty FFA and A.P Adams MD.

**AFFILIATION** United Medical and Dental Schools, Department of Anaesthetics, Guy's Hospital, London SE1, UK.

**INTRODUCTION** The absence of ventilation that may result from accidental esophageal intubation produces hypoxia rapidly and death if not detected in a timely fashion. It is important that all medical personnel are taught to recognise this potential hazard at an early stage in their careers. The objective of this study was to evaluate the ability and confidence of medical students to insert endotracheal tubes correctly and quickly recognise esophageal misplacement.

**METHODS** With approval from our committee on human research and informed consent, patients scheduled for elective surgery where orotracheal intubation was required as part of the anesthetic technique were studied. 20 medical students, randomly selected from the anesthesiology teaching block which comprises part of their first clinical year, were tested. All had prior theoretical instruction on the techniques of orotracheal intubation. Tracheal intubation was achieved by the medical student under the direct guidance of the investigator. The student was asked after the first attempt at intubation stage whether he or she had correctly placed the endotracheal tube (ETT) relying on the previously taught clinical methods of confirming correct placement.

The investigator then decided on the position of the tube using the FEF end-tidal carbon dioxide detector which has previously been shown to be reliable in confirming ETT position. The medical student was blinded to this information. The same student was studied during intubations on three different patients.

**RESULTS** 30 healthy patients, ASA status 1 or 2, median age 29.5 yr (range 15-64 yr) and weight 65.27 kg (range 49-102 kg) were studied. 7 (35%) of the medical students intubated the trachea correctly at their first attempt. 10 (50%) could make no decision regarding placement of the ETT after this first attempt. However, recognition improved on their second and third attempts (80% and 90% respectively). All 20 students intubated correctly on their third attempt.

**DISCUSSION** Medical students can obtain consistent results on clinically detecting the position of endotracheal tubes during intubation, with a minimal amount of practical instruction. We feel that this should be reinforced during the introductory anesthesia programme.

## REFERENCES

1. Canadian Anaesthetists' Society Journal 1979; 26: 472-8.
2. The end-tidal carbon dioxide detector device: D. O'Flaherty and A.P. Adams. Anaesthesia 1990; 45: (in press).
